1 **Title**

2 Occupational safety and health aspects of corporate social responsibility reporting in  
3 Japan: comparison between 2012 and 2020

4

5 Takahiro Shimizu<sup>1</sup>, Tomohisa Nagata<sup>1</sup>, Ayumi Fujimoto<sup>1</sup>, Shunsuke Inoue<sup>1</sup>, Masako  
6 Nagata<sup>2</sup>, Koji Mori<sup>1</sup>

7

- 8 1. Department of Occupational Health Practice and Management, Institute of Industrial  
9 Ecological Sciences, University of Occupational and Environmental Health, Japan,  
10 1-1 Iseigaoka, Yahatanishi-ku, Kitakyushu, Fukuoka 807-8555 Japan  
11 2. Department of Occupational Medicine, School of Medicine, University of  
12 Occupational and Environmental Health, Japan, Kitakyushu, Fukuoka, Japan

13

14 **Correspondence:**

15 Tomohisa Nagata, MD, PhD

16 Department of Occupational Health Practice and Management, Institute of Industrial  
17 Ecological Sciences, University of Occupational and Environmental Health, Japan, 1-1  
18 Iseigaoka, Yahatanishi-ku, Kitakyushu 807-8555, Japan.

19 email: tomohisa@med.uoeh-u.ac.jp; Tel: +81-93-603-1611; Fax: +81-93-603-2155

20

21

22

23 **Abstract**

24 **Background**

25 We aimed to survey the content of occupational safety and health (OSH) disclosed in  
26 corporate social responsibility (CSR)-related reports and integrated reports in 2020 and  
27 to compare the changes between 2012 and 2020 according to industry and company size.

28 **Methods**

29 We surveyed the websites of all 2,172 companies listed in the first section of the Tokyo  
30 Stock Exchange in 2020 and examined their CSR-related reports and integrated reports.  
31 CSR-related reports contain only non-financial information or are posted on webpages  
32 addressing sustainability and CSR. Integrated reports include financial information in  
33 addition to non-financial information or are posted in the investor relations section. We  
34 calculated the proportion of each report type and the proportion of OSH content in each  
35 report by industry sector and company size. To increase the reliability of the survey,  
36 five experts independently surveyed the same 40 companies and discussed any differing  
37 results. We prepared a survey manual based on these discussions. Twenty-five  
38 researchers assessed the presence or absence of each type of report and of OSH.

39 **Results**

40 Among all companies, 441 (20.3%) companies issued CSR-related reports and 590  
41 (28.1%) issued integrated reports. The number (percentage) of companies that issued  
42 either CSR-related reports or integrated reports was 880 (40.5%). The percentages of  
43 both CSR-related reports and integrated reports increased with increased company size.  
44 The number (percentage) of companies reporting OSH in CSR-related reports was 391  
45 (88.7%) and that in integrated reports was 493 (83.6%). The percentage of OSH  
46 reporting in CSR-related reports and integrated reports was high in secondary industries

47 and low in tertiary industries.

## 48 **Conclusions**

49 The companies that issued either a CSR-related report or an integrated report increased  
50 by 1.9% in 2020 compared with 2012. The percentage of companies that had described  
51 OSH in CSR-related reports and integrated reports were increased in 2020 compared  
52 with 2012. Many companies in Japan are emphasizing OSH in their CSR-related and  
53 integrated reports.

54

55 **Keywords:** Reporting, Corporate social responsibility, Integrated report, Occupational  
56 safety and health, Environmental social governance, Industry category, Company size

57

58

59

60

61

62

63

64

65

66

67

68

69

70

71 **Introduction**

72 Corporate social responsibility (CSR) has recently garnered attention and social interest.  
73 CSR is defined as a company's voluntary commitment to social and environmental  
74 considerations in the course of its business activities and relationships with stakeholders  
75 (all interested parties in organizational activities) [1]. The International Organization for  
76 Standardization issued ISO26000 to standardize CSR in 2010 [2]. CSR has become  
77 progressively important in social activities that are required to consider sustainability.

78 The Global Reporting Initiative (GRI) has established sustainability reporting  
79 guidelines on how to disclose information on CSR activities, which states that  
80 companies are accountable to their stakeholders [3]. CSR-related reports have been used  
81 as a medium for information disclosure, and information is disclosed both internally and  
82 externally via company websites in the form of PDF files. A previous study pointed out  
83 that the number of companies in Japan issuing CSR-related reports had increased as of  
84 2012 [4].

85 In addition to CSR-related reports, integrated reports have appeared as a  
86 method to disclose information to stakeholders, focusing on both non-financial and  
87 financial information. This arose owing to the concept of environmental social  
88 governance (ESG) proposed by the United Nations through the Principles for  
89 Responsible Investment in 2006 and the severe financial crisis triggered by the Lehman  
90 Brothers collapse in 2008 [5.6]. This financial crisis increased the need for long-term-  
91 oriented corporate management, and the importance of corporate governance and ESG  
92 became recognized [5.7]. This prompted the establishment of the International  
93 Integrated Reporting Council in 2011, and the International Integrated Reporting  
94 Framework was established in 2013 [8]. This framework defined integrated reports as

95 “a concise communication about how an organization’s strategy, governance,  
96 performance and prospects, in the context of its external environment, lead to the  
97 creation, preservation, or erosion of value over the short, medium, and long term” [8].  
98 The International Integrated Reporting Council has demonstrated that integrated  
99 reporting contributes to the stability and sustainability of financial capital markets; this  
100 sustainability is a concept that includes not only survival of the companies themselves  
101 but also social and environmental issues. The number of companies issuing integrated  
102 reports in Japan is reported to be on the increase [8]. It can be inferred that the shift  
103 from CSR-related reports to integrated reports is progressing [9, 10].

104 Occupational Safety and Health (OSH) is included in CSR activities. ISO26000  
105 proposes seven core subjects, one of which is labor practices. Labor practices include  
106 OSH, along with respect for the rights of workers, the importance of social dialogue,  
107 and responsibility for the human development of workers [2]. The GRI also mentions  
108 OSH in GRI403, which lists the specific OSH activities to be disclosed. A survey of  
109 Japanese companies listed in the first section of the Tokyo Stock Exchange between  
110 2004 and 2012 reported that an increasing number include OSH in their CSR-related  
111 reports [4]. OSH has been emphasized by workers, companies, and society as a factor  
112 that contributes to workers, as stakeholders. However, since the emergence of new  
113 forms of disclosing information, such as integrated reports, to the best of our knowledge,  
114 the methods and descriptions of information disclosure regarding CSR activities and  
115 OSH have not been clarified. We aimed to clarify trends in the disclosure of non-  
116 financial information and the recognition of OSH since the emergence of ESG and  
117 integrated reports by examining changes in the proportions of reports issued and of  
118 OSH content described.

119           We conducted a survey of listed companies to determine the proportions of  
120 CSR-related reports and integrated reports published in 2020, and the proportion of  
121 content in these reports addressing OSH. We examined changes in the methods of  
122 disclosing information on CSR and ESG activities and OSH by company size, classified  
123 based on industry and number of employees, comparing the presence of reports and  
124 changes in the description of OSH in 2012 and 2020. The purpose of this study was to  
125 clarify the trend and development of information disclosure on OSH activities in CSR-  
126 related reports and integrated reports.

127

128

129

130

131

132

133

134

135

136

137

138

139

140

141

142

143

144

145 **Methods**

146 We surveyed all 2,172 companies listed in the first section of the Tokyo Stock Exchange  
147 in 2020 to determine the percentage of reports issued and the content of the reports  
148 published on each company's website. The included companies were based on those  
149 listed on the website of the First Section of the Tokyo Stock Exchange on August 31,  
150 2020. We surveyed CSR-related reports and integrated reports independently. In cases  
151 where both types of report were issued, each report was tabulated separately. The  
152 contents of the survey addressed whether a report was issued and whether OSH was  
153 described. The distinction between CSR-related reports and integrated reports was  
154 determined using the name of the report and location of the report on the website. CSR-  
155 related reports can be found in the CSR activities, ESG activities, and sustainability  
156 sections of the website. In contrast, integrated reports are often posted in the investor  
157 relations section.

158         If the content of a report comprised only non-financial information, we  
159 determined it to be a CSR-related report. However, if financial information was  
160 presented together with non-financial information, we judged it to be an integrated  
161 report.

162         The inclusion criteria of a report were that it was published on a website in  
163 PDF format or in book form, that the report consisted of six or more pages excluding  
164 the front and back covers, and that the report was written in Japanese. The exclusion  
165 criteria for the reports were those prepared in English or languages other than Japanese,  
166 information disclosed only on the website, and no link to the report.

167           We assessed the presence or absence of descriptions of OSH activities in each  
168 CSR-related report and integrated report. When there was at least one description  
169 related to safety or health in the workplace, we judged that there was a description of  
170 OSH activities; examples include items related to safety and health, such as efforts to  
171 prevent occupational accidents, mental health care, existence of health education,  
172 setting of health and safety goals, utilization of occupational safety and health  
173 management systems, and the establishment of safety and health committees.

174           An independent survey of 40 companies was conducted by four experts in  
175 occupational medicine and one expert in accounting, making up a total of five  
176 researchers [4]. The survey methods were based on those used in previous studies [4]. In  
177 the case of differences in the survey results, the causes of the differences were clearly  
178 defined and the survey methods were summarized in a manual. From July 2020 to  
179 February 2021, a total of 20 people, 16 experts in occupational medicine and four  
180 medical students studying occupational medicine, conducted a website survey on the  
181 existence of CSR-related reports, integrated reports, and descriptions of OSH. We were  
182 unable to examine the contents of all integrated reports during this period. Therefore,  
183 from July to September 2021, five medical students conducting research in occupational  
184 medicine carried out an additional survey of the integrated reports. In this case, we  
185 surveyed reports published in 2020 and excluded those published in 2021. Each  
186 researcher surveyed the same companies. In cases where the results of the survey were  
187 not matched (for example, presence or absence of reports, categorized types of report,  
188 and OSH mentioned or not), we examined the causes and made modifications to  
189 standardize the survey.

## 190 **Statistical analysis**



191 We classified the companies into 10 industries, as in a previous study, to determine the  
192 percentage of reports issued by industry and company size and the proportion of OSH.  
193 We categorized company size according to the number of employees. The 10 industries  
194 were Fisheries, agriculture, and forestry; Mining; Construction; Manufacturing;  
195 Electricity and gas; Transportation, information, and communication; Commerce;  
196 Finance and insurance; Real estate; and Services. The number of employees was  
197 classified into ranges of 49 or fewer, 50–299, 300–999, 1000–2999, 3000–4999, 5000–  
198 9999, and 10,000 or more; the percentage of reports issued was investigated.

199 We examined the relationship among company size according to industry,  
200 number of employees, and percentage of reports issued, type of report, and descriptions  
201 of OSH. Statistical analysis was performed using Stata/SE 16 software for Windows  
202 (Stata Corp LLC, College Station, TX, USA).

203 We only used publicly available information in the study.

204

205

206

207

208

209

210

211

212

213

214

215

216

217

218

219

## 220 **Results**

221 Table 1 shows the number of listed companies by industry and company size based on  
222 the number of employees. In 2020, the number of listed companies was 2172. By  
223 industry, the Manufacturing sector was the largest with 914 companies (42.1%),  
224 followed by Commerce with 381 companies (17.5%), Transportation, information, and  
225 communication with 305 companies (14.0%), and Services with 225 companies (10.4%).  
226 By size, companies with 300–999 employees accounted for the largest number of  
227 companies with 756 (34.8%), and the number of companies in each category decreased  
228 with increased company size.

229 Table 2 describes CSR-related and integrated reports issued in 2020. The  
230 number (percentage) of companies that issued CSR-related reports was 441 (20.3%),  
231 and integrated reports were issued by 590 companies (28.1%); the proportion of  
232 integrated reports was higher than that of CSR-related reports. In total, 880 companies  
233 (40.5%) issued CSR-related reports or integrated reports.

234 In 2020, by industry, 37 companies (36.3%) in the Construction sector issued  
235 the highest percentage of CSR-related reports, followed by 2 companies (33.3%) in the  
236 Mining sector and 282 companies (30.9%) in the Manufacturing sector. The number  
237 (percentage) of companies issuing integrated reports was highest in the Electricity and  
238 gas sector at 14 (66.7%), followed by the Finance and insurance sector at 80 (58.4%)

239 and the Manufacturing sector at 309 (35.6%). Among companies that issued either a  
240 CSR-related report or an integrated report, 16 (72.7%) companies in the Electricity and  
241 gas category issued the highest percentage of reports, followed by 81 (58.3%) in the  
242 Finance and insurance category, 495 (54.2%) in the Manufacturing category, 54 (52.9%)  
243 in the Construction category, and 3 (50.0%) in the Mining category.

244 The percentage of published CSR-related reports increased consistently with  
245 increased company size in 2020. For integrated reports, there was a large increase from  
246 18.2% to 37.9% in companies with 300–999 and 1000–2999 employees, respectively,  
247 and a further increase to 70.0% in the next tier of 3000–4999 employees. The  
248 percentage of companies that issued either CSR-related reports or integrated reports  
249 increased with increased company size, and the percentage increased sharply from  
250 1000–2999 to 3000–4999 employees.

251 Table 3 presents descriptions of OSH activities in CSR-related reports and  
252 integrated reports in 2020. The rate of OSH descriptions was 88.7% in CSR-related  
253 reports and 83.6% in integrated reports during 2020. By industry, 100% of companies in  
254 the Electricity and gas and in the Fisheries, agriculture and forestry sectors, 94.6% in  
255 the Construction sector, 91.5% in the Manufacturing sector, and 90.0% in the Real  
256 estate sector described their OSH activities in their 2020 CSR-related reports. The  
257 percentage of OSH activities described in integrated reports was more than 83.6% in  
258 Fisheries, agriculture, forestry; Mining; Construction; Electricity and gas (100%), and  
259 Manufacturing (90.3%).

260 With regard to company size, the percentage of companies with more than  
261 3000–4999 employees and that published CSR-related reports was more than 88.7% of  
262 the total CSR-related reports in 2020. In the case of published integrated reports, the

263 percentage of companies with more than 1000–2999 employees exceeded 83.6% of all  
264 integrated reports.

265

266

267

## 268 **Discussion**

269 We examined the method of disclosing information on CSR and ESG activities in  
270 comparison with a previous study in 2012 and found that the number of CSR-related  
271 reports published by companies in Japan has decreased and the percentage of any  
272 reports, including integrated reports, has increased slightly. Additionally, we found that  
273 the publication of reports and description of OSH are unevenly distributed among  
274 industries and companies of different sizes. We discuss these factors and future  
275 prospects below.

276 The percentage of CSR-related reports was decreased compared with this  
277 percentage in 2012. This suggests that with the advent of ESG, some companies that  
278 formerly issued CSR-related reports have switched to issuing integrated reports.  
279 Integrated reports appeared with the emergence of the Integrated Reporting Framework  
280 of the IIRC in 2013 [8]. We considered integrated reports to be similar to CSR-related  
281 reports, which deal with non-financial information, and we assessed whether any of  
282 these two types of report had been issued by companies [8]. The percentage of any of  
283 these reports issued increased slightly, indicating that the rising trend of issuing reports  
284 is ongoing.

285 How OSH is disclosed in CSR-related reports and integrated reports is based  
286 on the assumption that companies issue each report. We first checked the publication

287 status of each report by industry and company size. Secondary industries represented by  
288 Electricity and gas, Manufacturing, and Construction both had a high percentage of  
289 CSR-related reports and integrated reports issued in 2020; the same trend was observed  
290 in 2012 [4]. Additionally, the proportion of secondary industries that issued integrated  
291 reports was high, indicating that these companies are now issuing more integrated  
292 reports. The percentage of CSR-related reports issued by companies in the Electricity  
293 and gas sector decreased significantly, and that of integrated reports in this sector  
294 increased the most. Electricity and gas showed the largest shift in the form of report  
295 publication compared with 2012.

296 Tertiary industries such as Services; Real estate; Commerce; and  
297 Transportation, information, and communication had low rates of issuing CSR-related  
298 and integrated reports in 2020. In particular, the service industry had the lowest rate of  
299 issuing CSR-related reports and integrated reports, both in the current study and in a  
300 previous study [4]. We considered that some tertiary industries are not interested in  
301 publishing these reports. However, the publication rate of CSR-related reports in 2020  
302 was low in the Finance industry as well as in other tertiary industries, but a high  
303 publication rate was observed for integrated reports in this sector. This is because banks  
304 are required to issue periodic reports according to Article 21 of the Banking Act in  
305 Japan; these periodic reports are called integrated reports or annual reports, in which  
306 non-financial information is disclosed [11].

307 In terms of company size according to number of employees, the percentages  
308 of CSR-related reports and integrated reports issued increased with the size of the  
309 company. The same trend was observed for CSR-related reports in 2012 [4]. This  
310 indicates that the larger the company size, the more active it is in issuing integrated

311 reports. It has been reported that the ESG score provided by rating agencies, used to  
312 evaluate the ESG management of a company, is positively correlated with the size of the  
313 company [12]. Larger companies are more active in ESG activities and may have a  
314 higher percentage of non-financial information that is disclosed and a higher ESG score.

315         When considering the purpose of each type of report, the percentage of OSH  
316 content in CSR-related reports in 2020 increased, suggesting that OSH is becoming  
317 increasingly important. The percentage of OSH in integrated reports was also high,  
318 suggesting that not only companies but also investors and stakeholders are interested in  
319 OSH. The percentage of OSH described in CSR-related reports and integrated reports  
320 suggests that OSH may be more strongly recognized as a social responsibility.

321         The percentage of OSH in CSR-related reports in 2020 was more than 80% in  
322 all industries except Commerce and Mining. The percentage of OSH in the tertiary  
323 sector was low for integrated reports. This suggests that OSH is recognized as a social  
324 responsibility and comprises non-financial information in a wide range of industries,  
325 although it is considered that tertiary industries such as Commerce have less recognition  
326 that OSH is information that should be disclosed to stakeholders. A program exists to  
327 survey and certify the health promotion efforts of employees in Japan, but the  
328 participation rate of tertiary industries in this health management survey is low [13]. It  
329 is considered that tertiary industries may have low awareness about OSH. OSH includes  
330 the element of safety, so it is possible that tertiary industries, which do not directly  
331 perform hazardous work, do not have sufficient descriptions about safety, resulting in  
332 low results. Additionally, companies are required to have high awareness about human  
333 rights throughout the supply chain [14]. Companies within the supply chain may also be  
334 required to have a high level of awareness about human rights, and this may be a factor

335 that affects the percentage of OSH content in reports.

336           The percentage of OSH in CSR-related reports in 2020 increased with  
337 increased company size. For integrated reports, the percentage of companies with 1000–  
338 2999 employees or more exceeded the overall percentage of companies that issued  
339 integrated reports. The larger the company, the higher the proportion of OSH content in  
340 the integrated report. It is thought that this is because the larger the company, the more  
341 resources it has to promote OSH and the greater its responsibility to society to promote  
342 health and safety. In CSR-related reports and integrated reports for 2020, the proportion  
343 of OSH descriptions in the reports was lowest for companies with 49 or fewer  
344 employees. According to the law in Japan, the health and safety system changes  
345 depending on whether there are 50 or more employees, [15], which may have an effect  
346 on the rate of reporting on health and safety. Specifically, the obligation to hold health  
347 and safety committee meetings, to appoint a health and safety promoter, and to appoint  
348 an industrial physician arises when the number of employees exceeds 50, which may  
349 cause differences in health and safety efforts [15]. Although it is not possible to  
350 generalize the results of this survey because there is a possibility that the health and  
351 safety department exists separately from the holding company, it is considered a factor  
352 to be noted.

353           It is likely that the publication format of reports will continue to change from  
354 that in this survey. Whether the shift from CSR-related reports to integrated reports will  
355 progress needs to be investigated in future surveys. In this survey, the percentage of  
356 OSH entries was examined, but factors influencing the proportion of OSH content was  
357 not clarified. However, the frequency was higher in tertiary industries compared with  
358 secondary industries, according to Japanese statistics regarding industrial accidents [16].

359 Companies in the tertiary industry sector and other industries with low OSH reporting  
360 may be able to contribute to improve OSH for workers by promoting OSH disclosure.

361           There are at least three strengths in this paper. First, we conducted a survey of  
362 all listed companies in 2020. Second, some studies have investigated the changes in the  
363 number of integrated reports issued in Japan; however, to our best knowledge, no  
364 studies have investigated the changes in CSR-related reports and integrated reports.  
365 Third, to the best of our knowledge, no studies have observed the rate of OSH in CSR-  
366 related reports and integrated reports. From the results of this study, it is possible to  
367 observe changes in the nature of disclosure of non-financial information in Japan and  
368 the extent to which OSH is given attention in such disclosure, which may provide a  
369 basis for health and safety professionals to call for the incorporation of OSH in ESG and  
370 CSR-related activities.

371           There are at least three limitations of this survey. First, variation among  
372 surveyors cannot be completely excluded. We tried to eliminate the differences in  
373 understanding and perception among researchers by developing a manual based on past  
374 survey methods, involving all researchers in the conduct of surveys within the same  
375 company, and examining and defining differences in the results. However, we cannot  
376 say that we were able to completely exclude these differences; there is a possibility that  
377 there were differences in judgment among the researchers. Second, there were 75  
378 integrated reports written only in English, which were excluded from the survey. An  
379 integrated report is a medium for disclosing non-financial information to investors,  
380 including those who are overseas, and it differs from the nature of CSR-related reports;  
381 this is thought to have caused differences in the language of disclosure. Therefore, the  
382 publication rate of reports and the rate of OSH disclosure may vary from the figures in



383 this survey. However, the number of integrated reports issued by listed companies in  
384 2012 was very small (57 companies); we consider that this did not have a significant  
385 impact on the results of the 2012 survey. Additionally, the number of reports in English  
386 was small compared with the total number of reports, and the analysis was conducted  
387 after excluding the number of integrated reports "issued", so we believe that the impact  
388 is small. Third, if the number of companies that directly list CSR/ESG information on  
389 their websites increases, this survey may not accurately represent the actual status of  
390 non-financial information disclosure. However, standardizing the condition that the  
391 survey be in the form of a report offers the advantage of being able to make  
392 comparisons with past surveys. The accounting firm KPMG reports that the number of  
393 integrated reports is increasing each year. Because information disclosure in the form of  
394 a report is still considered to be the norm, we believe it is appropriate to conduct a  
395 survey focusing on reports [9.10].

396

## 397 **Conclusions**

398 There was a slight increase in the percentage of companies that issued either CSR-  
399 related reports or integrated reports in 2020, as compared with 2012. The percentage of  
400 companies issuing integrated reports has been increasing. In particular, the percentage  
401 of disclosed OSH-related content also increased in both CSR-related reports and  
402 integrated reports. The medium for disclosure of non-financial information is changing  
403 to integrated reports with the emergence of ESG, and recognition of the importance of  
404 OSH is continuously improving. It is expected that research and comparisons of  
405 integrated reports will become increasingly important in the future.

406

407 **Abbreviations**

408 CSR Corporate social responsibility  
409 ESG Environmental social governance  
410 OSH Occupational safety and health  
411 GRI Global Reporting Initiative

412

413 **Declarations**

414 **Ethics approval and consent to participate**

415 All data used for the study are publicly available.

416 **Consent for publication**

417 Not applicable.

418 **Availability of data and materials**

419 Data supporting these findings are stored by Occupational Health Practice and  
420 Management, Institute of Industrial Ecological Sciences, University of Occupational  
421 and Environmental Health, Japan. Requests for information should be directed to the  
422 corresponding author.

423

424 **Competing interests**

425 The authors declare that they have no competing interests.

426

427 **Funding**

428 The present study was supported by a Health and Labour Sciences Research Grant  
429 2020–2022 (20JA1005) from the Ministry of Health, Labour and Welfare, Japan.

430

431 **Authors' contributions**

432 TS, TN and KM planned the study. TS and TN drafted the manuscript. TS, TN, AF, SI  
433 and MN created the database of CSR reporting and Integrated reporting. TS and TN  
434 performed the statistical analysis. All the authors read and approved the final manuscript.

435

436 **Acknowledgments**

437 The authors express their sincere appreciation to Dr. Masanao Kaneto of Hosei  
438 University and Dr. Takahiro Mori, Dr. Miho Omori, Dr. Kosuke Sakai, Dr. Hirotsuke  
439 Takahashi, Dr. Kotaro Nagata, Dr. Masatoshi Goami, Dr. Hiroyuki Kuwabara, Dr.  
440 Naozumi Sueyoshi, Dr. Hayato Shimoda, Dr. Riku Hachisuka, Dr. Ryoma Kin, Dr. Mio  
441 Shibagaki, Dr. Satoru Fujisawa, Dr. Natsuho Miura, Dr. Haruka Takahata, Dr. Ryo  
442 Ishimaru, Dr. Souma Shirasawa, Dr. Kakeru Tsutsumi, and Dr. Tomoya Sakai of the  
443 University of Occupational and Environmental Health, Japan, who supported us in the  
444 analysis of CSR-related reporting and integrated reports. We thank Analisa Avila, MPH,  
445 ELS, of Edanz (<https://jp.edanz.com/ac>) for editing a draft of this manuscript.

446

447 **References**

- 448 1. Zwetsloot G, Starren A. European Agency for Safety and Health at work: corporate  
449 social responsibility and safety and health at work. Luxembourg: Office for Official  
450 Publications of the European Communities; 2004.
- 451 2. International Organisation for Standardization. Guidance on social responsibility  
452 (ISO 26000:2010) <https://www.iso.org/iso-26000-social-responsibility.html>. Accessed 7  
453 Feb 2022.
- 454 3. Global Reporting Initiative: G4 sustainability reporting guidelines.

- 455 2013. [https://respect.international/wp-content/uploads/2017/10/G4-Sustainability-Reporting-](https://respect.international/wp-content/uploads/2017/10/G4-Sustainability-Reporting-Guidelines-Implementation-Manual-GRI-2013.pdf)  
456 [Guidelines-Implementation-Manual-GRI-2013.pdf](https://respect.international/wp-content/uploads/2017/10/G4-Sustainability-Reporting-Guidelines-Implementation-Manual-GRI-2013.pdf). Accessed 7 Feb 2022.
- 457 4. Tomohisa N, Akinori N, Koji M, Takashi M, Futoshi K, Masako N. Occupational  
458 safety and health aspects of corporate social responsibility reporting in Japan from 2004  
459 to 2012. *BMC Public Health*. 2017;17:381.
- 460 5. Principles Responsible Investment. About the PRI. [https://www.unpri.org/pri/about-](https://www.unpri.org/pri/about-the-pri)  
461 [the-pri](https://www.unpri.org/pri/about-the-pri). Accessed 7 Feb 2022.
- 462 6. Miralles-Quirós M, Miralles-Quirós J, Hernández, J. ESG performance and  
463 shareholder value creation in the banking industry: international differences.  
464 *Sustainability*. 2019;11:1404.
- 465 7. International Integrated Reporting Council. 10 years of the IIRC.  
466 <https://www.integratedreporting.org/10-years/10-years-summary>. Accessed 7 Feb 2022.
- 467 8. International Integrated Reporting Council. International <IR> Framework.  
468 <https://www.integratedreporting.org/resource/international-ir-framework/>. Accessed 7  
469 Feb 2022.
- 470 9. KPMG Japan. Corporate Governance Center of Excellence Integrated Reporting Task  
471 Force. Survey of Integrated Reporting in Japan 2020.  
472 <https://assets.kpmg/content/dam/kpmg/jp/pdf/2021/jp-integrated-reporting2020.pdf>.  
473 Accessed 7 Feb 2022.
- 474 10. Corporate Value Reporting Lab. Trends in Integrated Reporting that Support  
475 Sustainable Growth in Japan 2020. [http://cvrl-net.com/archive/pdf/list2020\\_en\\_202105.pdf](http://cvrl-net.com/archive/pdf/list2020_en_202105.pdf).  
476 Accessed 7 Feb 2022.
- 477 11. Banking Act. Article 21 (1). [https://elaws.e-](https://elaws.e-gov.go.jp/document?lawid=356AC0000000059)  
478 [gov.go.jp/document?lawid=356AC0000000059](https://elaws.e-gov.go.jp/document?lawid=356AC0000000059). Accessed 7 Feb 2022.

479 12. Samuel D, Christian K, Bernhard Z. The influence of firm size on the ESG score:  
480 corporate sustainability ratings under review. J Bus Ethics. 2020; doi:10.1007/s10551-  
481 019-04164-1.

482 13. Ministry of Economy, Trade and Industry, Japan. Survey of health management  
483 level. Promotion of Health Management, and regarding "Health Management Brand  
484 2021" and "Excellent Health Management Corporation 2021".  
485 [https://www.meti.go.jp/policy/mono\\_info\\_service/healthcare/downloadfiles/1\\_METI\\_R](https://www.meti.go.jp/policy/mono_info_service/healthcare/downloadfiles/1_METI_R2kenkoukeieikensyoseido_setsumei_shiryo.pdf)  
486 [2kenkoukeieikensyoseido\\_setsumei\\_shiryo.pdf](https://www.meti.go.jp/policy/mono_info_service/healthcare/downloadfiles/1_METI_R2kenkoukeieikensyoseido_setsumei_shiryo.pdf). Accessed 7 Feb 2022.

487 14. United Nations. Guiding Principles on Business and Human Rights. Implementing  
488 the United Nations "Protect, Respect and Remedy" Framework.  
489 [https://www.ohchr.org/documents/issues/business/a-hrc-17-31\\_aev.pdf](https://www.ohchr.org/documents/issues/business/a-hrc-17-31_aev.pdf). Accessed 7 Feb  
490 2022.

491 15. Ordinance on Industrial Safety and Health, Japan.  
492 <http://www.japaneselawtranslation.go.jp/law/detail/?id=3878&vm=&re=>. Accessed 7  
493 Feb 2022.

494 16. Ministry of Health, Labour and Welfare, Japan. Survey of Occupational Accident  
495 Trends (Survey of Workplaces with 100 or More Employees and General Construction  
496 Industry) in Japan.  
497 <https://www.mhlw.go.jp/toukei/itiran/roudou/saigai/20/dl/2020toukeihyo.pdf>. Accessed  
498 7 Feb 2022.

499

500

501

502

503

504

505

506

507

508

509

510

511

512 Table 1. Description of Japanese companies listed in the first section of the Tokyo Stock

513 Exchange.

|                                                | 2012 |      | 2020 |      |
|------------------------------------------------|------|------|------|------|
|                                                | N    | %    | N    | %    |
| Total                                          | 1717 |      | 2172 |      |
| Industry category                              |      |      |      |      |
| Fisheries, agriculture, and forestry           | 5    | 0.3  | 7    | 0.3  |
| Mining                                         | 7    | 0.4  | 6    | 0.3  |
| Construction                                   | 97   | 5.6  | 102  | 4.7  |
| Manufacturing                                  | 844  | 49.2 | 914  | 42.1 |
| Electricity and gas                            | 17   | 1.0  | 22   | 1.0  |
| Transportation, information, and communication | 169  | 9.8  | 305  | 14.0 |
| Commerece                                      | 300  | 17.5 | 381  | 17.5 |
| Finance and insurance                          | 129  | 7.5  | 139  | 6.4  |
| Real estate                                    | 48   | 2.8  | 71   | 3.3  |
| Services                                       | 101  | 5.9  | 225  | 10.4 |
| Company size                                   |      |      |      |      |
| -49                                            | 70   | 4.1  | 139  | 6.4  |
| 50-299                                         | 274  | 16.0 | 462  | 21.3 |
| 300-999                                        | 594  | 34.6 | 756  | 34.8 |
| 1000-2999                                      | 501  | 29.2 | 511  | 23.5 |
| 3000-4999                                      | 133  | 7.7  | 126  | 5.8  |
| 5000-9999                                      | 69   | 4.0  | 80   | 3.7  |
| 10000-                                         | 59   | 3.4  | 57   | 2.6  |
| uncertain                                      | 17   | 1.0  | 41   | 1.9  |

514 N: Number of companies.

515

516

517

518

519

520

521

522

523 Table2. Companies listed in first section of Tokyo Stock Exchange with published CSR-

524 related and integrated reports.

|                                                | 2012: CSR reports* |       | 2020: CSR reports |       | 2020: Integrated reports |       | 2020: CSR reports or integrated reports |       |
|------------------------------------------------|--------------------|-------|-------------------|-------|--------------------------|-------|-----------------------------------------|-------|
|                                                | n                  | %     | n                 | %     | n                        | %     | n                                       | %     |
| Total                                          | 663                | 38.6% | 441               | 20.3% | 590                      | 28.1% | 880                                     | 40.5% |
| Industry category                              |                    |       |                   |       |                          |       |                                         |       |
| Fisheries, agriculture, and forestry           | 3                  | 60.0% | 2                 | 28.6% | 1                        | 14.3% | 3                                       | 42.9% |
| Mining                                         | 3                  | 42.9% | 2                 | 33.3% | 2                        | 33.3% | 3                                       | 50.0% |
| Construction                                   | 55                 | 56.7% | 37                | 36.3% | 22                       | 24.2% | 54                                      | 52.9% |
| Manufacturing                                  | 427                | 50.6% | 282               | 30.9% | 309                      | 35.6% | 495                                     | 54.2% |
| Electricity and gas                            | 14                 | 82.4% | 6                 | 27.3% | 14                       | 66.7% | 16                                      | 72.7% |
| Transportation, information, and communication | 43                 | 25.4% | 33                | 10.8% | 52                       | 17.4% | 77                                      | 25.2% |
| Commerece                                      | 66                 | 22.0% | 39                | 10.2% | 67                       | 17.8% | 94                                      | 24.7% |
| Finance and insurance                          | 29                 | 22.5% | 15                | 10.8% | 80                       | 58.4% | 81                                      | 58.3% |
| Real estate                                    | 9                  | 18.8% | 10                | 14.1% | 12                       | 17.4% | 16                                      | 22.5% |
| Services                                       | 14                 | 13.9% | 15                | 6.7%  | 31                       | 13.8% | 41                                      | 18.2% |
| Company size                                   |                    |       |                   |       |                          |       |                                         |       |
| –49                                            | 15                 | 21.4% | 12                | 8.6%  | 18                       | 13.0% | 29                                      | 20.9% |
| 50–299                                         | 51                 | 18.6% | 47                | 10.2% | 56                       | 12.5% | 93                                      | 20.1% |
| 300–999                                        | 152                | 25.6% | 122               | 16.1% | 133                      | 18.2% | 234                                     | 31.0% |
| 1000–2999                                      | 241                | 48.1% | 145               | 28.4% | 184                      | 37.9% | 287                                     | 56.2% |
| 3000–4999                                      | 91                 | 68.4% | 43                | 34.1% | 84                       | 70.0% | 99                                      | 78.6% |
| 5000–9999                                      | 50                 | 72.5% | 31                | 38.8% | 56                       | 72.7% | 64                                      | 80.0% |
| 10000–                                         | 52                 | 88.1% | 32                | 56.1% | 43                       | 76.8% | 53                                      | 93.0% |
| uncertain                                      | 11                 | 64.7% | 9                 | 22.0% | 16                       | 39.0% | 21                                      | 51.2% |

n: number of companies

\* Nagata et al. BMC Public Health (2017).

CSR, corporate social responsibility.

525

526

527

528

529

530

531

532

533

534

535

536

537 Table 3. Companies describing occupational safety and health activities in CSR-related

538 or integrated reports.



|                                                | 2012: CSR reports* |        | 2020: CSR reports |        | 2020: Integrated reports |        |
|------------------------------------------------|--------------------|--------|-------------------|--------|--------------------------|--------|
|                                                | n(OSH)             | %*1    | n(OSH)            | %*1    | n(OSH)                   | %*2    |
| Total                                          | 507                | 76.5%  | 391               | 88.7%  | 493                      | 83.6%  |
| Industry category                              |                    |        |                   |        |                          |        |
| Fisheries, agriculture, and forestry           | 2                  | 66.7%  | 2                 | 100.0% | 1                        | 100.0% |
| Mining                                         | 3                  | 100.0% | 1                 | 50.0%  | 2                        | 100.0% |
| Construction                                   | 47                 | 85.5%  | 35                | 94.6%  | 22                       | 100.0% |
| Manufacturing                                  | 337                | 78.9%  | 258               | 91.5%  | 279                      | 90.3%  |
| Electricity and gas                            | 12                 | 85.7%  | 6                 | 100.0% | 14                       | 100.0% |
| Transportation, information, and communication | 37                 | 86.0%  | 27                | 81.8%  | 43                       | 82.7%  |
| Commerce                                       | 42                 | 63.6%  | 27                | 69.2%  | 49                       | 73.1%  |
| Finance and insurance                          | 14                 | 48.3%  | 13                | 86.7%  | 53                       | 66.3%  |
| Real estate                                    | 7                  | 77.8%  | 9                 | 90.0%  | 10                       | 83.3%  |
| Services                                       | 6                  | 42.9%  | 13                | 86.7%  | 20                       | 64.5%  |
| Company size                                   |                    |        |                   |        |                          |        |
| –49                                            | 12                 | 80.0%  | 7                 | 58.3%  | 12                       | 66.7%  |
| 50–299                                         | 40                 | 78.4%  | 37                | 78.7%  | 46                       | 82.1%  |
| 300–999                                        | 101                | 66.4%  | 109               | 89.3%  | 99                       | 74.4%  |
| 1000–2999                                      | 182                | 75.5%  | 128               | 88.3%  | 156                      | 84.8%  |
| 3000–4999                                      | 74                 | 81.3%  | 39                | 90.7%  | 76                       | 90.5%  |
| 5000–9999                                      | 42                 | 84.0%  | 31                | 100.0% | 53                       | 94.6%  |
| 10000–                                         | 47                 | 90.4%  | 31                | 96.9%  | 37                       | 86.0%  |
| uncertain                                      | 9                  | 81.8%  | 9                 | 100.0% | 14                       | 87.5%  |

n (OSH): number of companies that describing OSH in reports.

\* Nagata et al. BMC Public Health (2017).

\*1: proportion of companies describing occupational safety and health activities among companies that published CSR-related reports.

\*2: proportion of companies describing occupational safety and health activities among companies that published integrated reports.

539 CSR, corporate social responsibility; OSH, occupational safety and health.
